# Supplementary material
Source: MDPI journal article supplement (https://www.mdpi.com/2036-7422/13/1/10)
Supplement: s1 [file s1]

Supplemental information, results from Normal Chow (NC) diet

SI figure 1

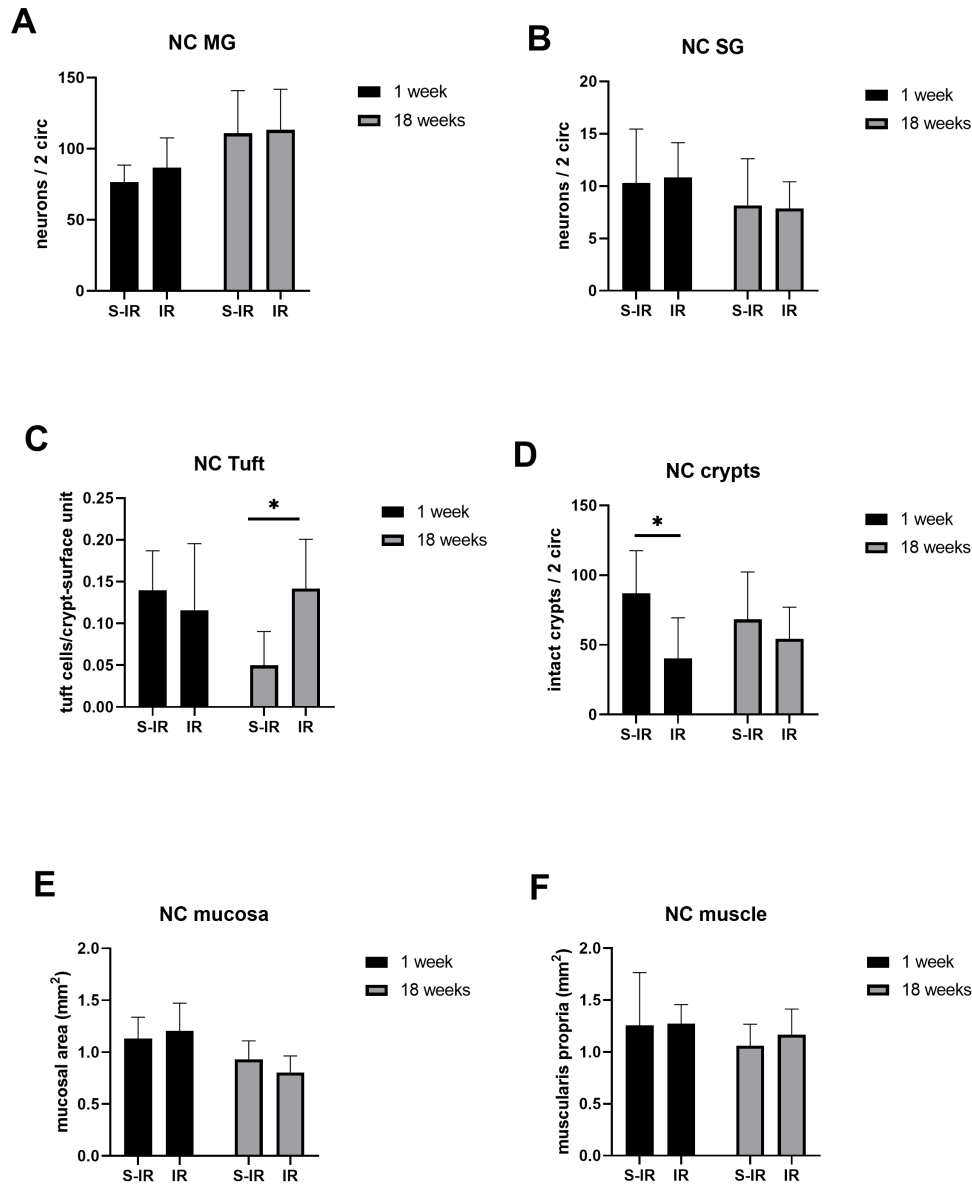

SI Figure 1 overview of results from analyses of morphometric, neuronal, tuft cell and histological intact crypt surface in animals fed normal chow (NC) in experiment 1 (1 week) and experiment 2 (18 weeks). A-B No time or treatment effect is found in myenteric (A) and submucosal (B) neuronal numbers at 1 or 18 weeks after sham irradiation (S-IR) or irradiation (IR). C-D. An IR-induced increase of tuft cell numbers (C) is seen after 18 weeks after irradiation, IR also reduces the number of intact crypt surface units (D) at 1 weeks, while there was no effect of treatment at 18 weeks. E-F. No effect on time or treatment is seen in morphometric analyses of mucosal (E) or muscularis propria (F) area. Data +/- SD, n=3-8, \* p<0.05

SI figure 2

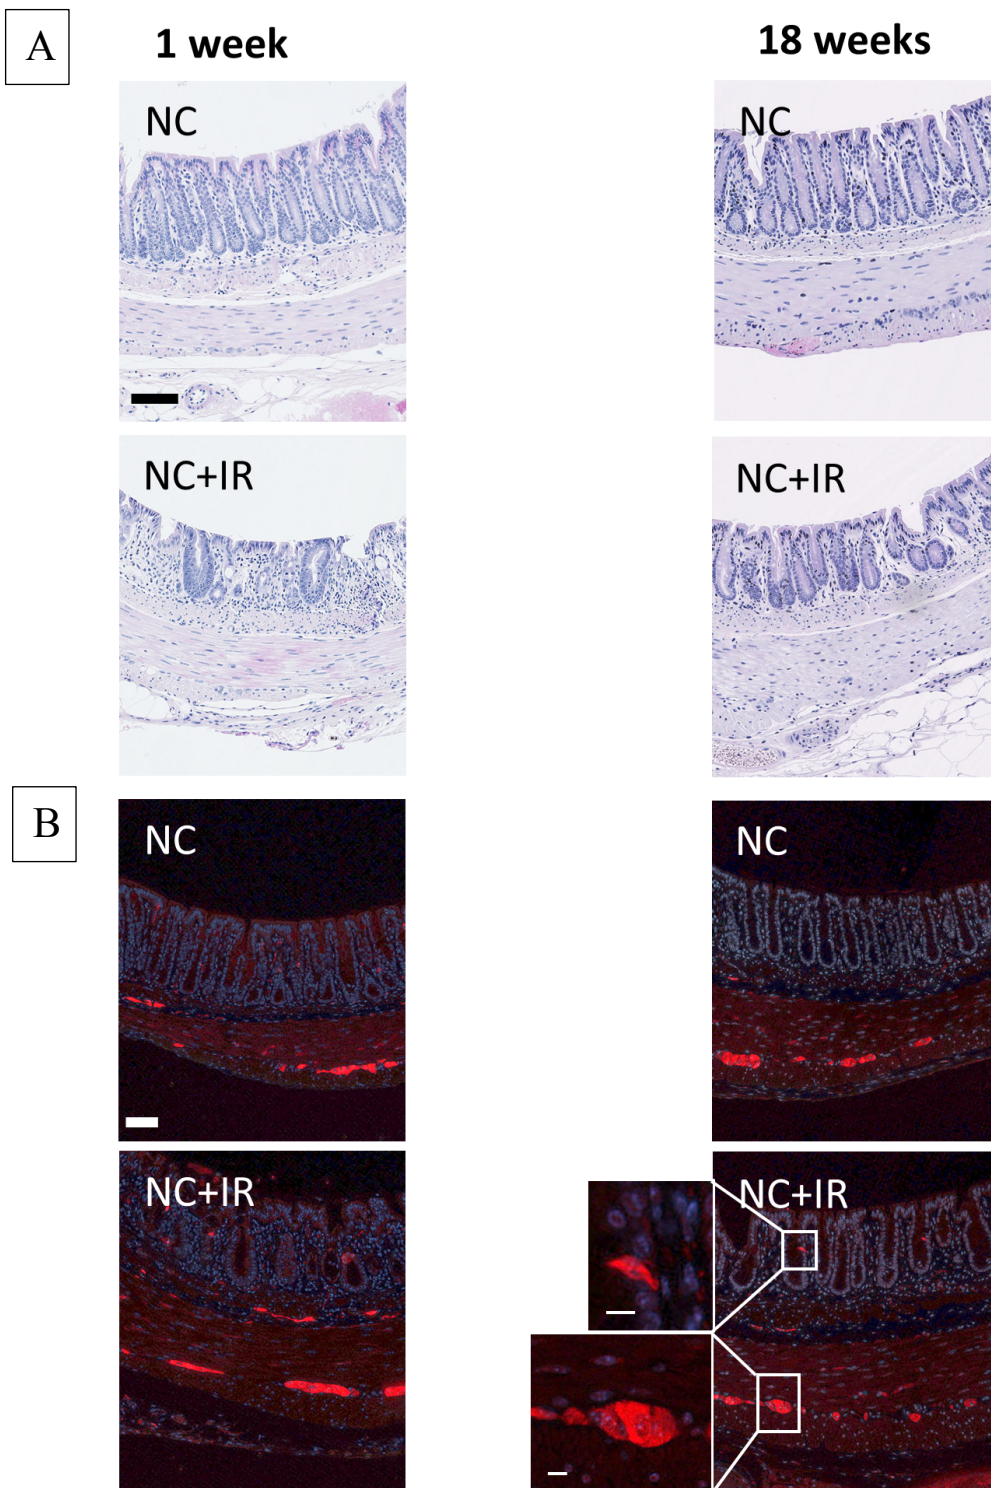

SI figure 2, representative micrographs of H&E stained (A) or ICC (B) stained tissues after 3 weeks of feeding 1 week after treatment and after 20 weeks of feeding 18 weeks after treatment. Sham irradiated tissues upper row and irradiated (IR) tissues bottom row. Bar represents 50  $\mu$ m, bar in inserts represents 20  $\mu$ m.

## SI figure 3

Supplemental figure, QQ plots of group analyses included in manuscript

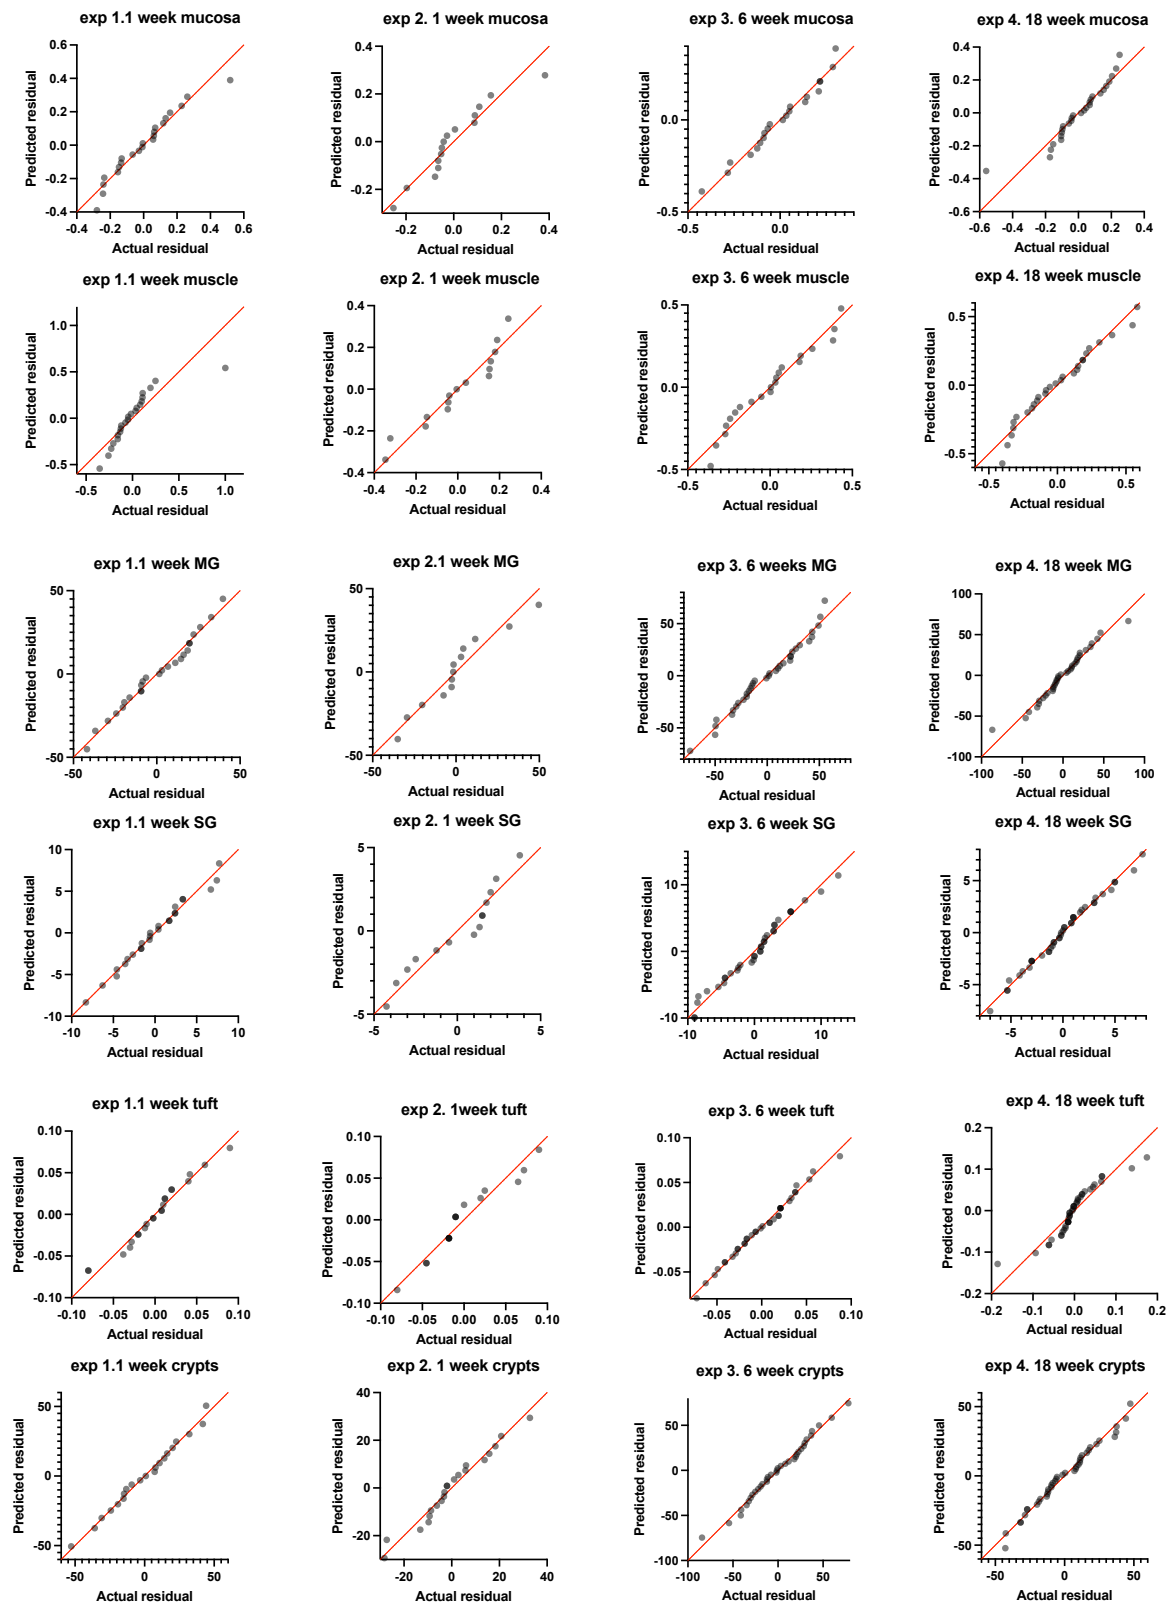

SI3 QQ plots for each of the analyses included in the manuscript, overall a good linearity is present suggesting data can be analysed using of two-way-ANOVA followed by sidak multiple comparison analyses.
